# Supplementary material for: Determination of Volatile Organic Compounds (VOCs) from Wrapping Films and Wrapped PDO Italian Cheeses by Using HS-SPME and GC/MS
Source: PubMed Central journal article supplement (PMC6271448; doi:10.3390/molecules19078707), 2014-06-25
Supplement: molecules-19-08707-s001.pdf [file molecules-19-08707-s001.pdf]

## Supplementary Information

**Table S1.** Linearity (determination coefficient ( $r^2$ ), LOD, LOQ, Precision (R.D.S) and Recovery parameters of the proposed SPME method for a 50 ng g<sup>-1</sup> spike.

| Investigated VOCs | LOD<br>(ng g <sup>-1</sup> ) | LOQ<br>(ng g <sup>-1</sup> ) | Recovery %<br>(R.S.D.) | Determination<br>Coefficient ( $r^2$ ) |
|-------------------|------------------------------|------------------------------|------------------------|----------------------------------------|
| 2-Ethylhexanol    | 0.99                         | 2.97                         | 95 (4.5)               | 0.9970                                 |
| Ethylbenzene      | 1.26                         | 3.78                         | 90 (4.6)               | 0.9988                                 |
| <i>p</i> -Xylene  | 1.17                         | 3.51                         | 85 (3.4)               | 0.9998                                 |
| <i>m</i> -Xylene  | 1.26                         | 3.77                         | 82 (3.7)               | 0.9989                                 |
| <i>o</i> -Xylene  | 0.91                         | 2.73                         | 87 (5.2)               | 0.9978                                 |
| Styrene           | 0.95                         | 2.84                         | 93 (4.3)               | 0.9984                                 |
| Triacetin         | 1.22                         | 3.66                         | 95 (4.8)               | 0.9978                                 |

**Table S2.** Global migration values of cling-film for retail use (Reg. UE 10/2011).

| Cling-film | Composition-Material | Global migration<br>(mg/dm <sup>2</sup> ± Standard Deviation) |
|------------|----------------------|---------------------------------------------------------------|
| PE200      | PE based film        | 7.36 ± 1.45                                                   |
| 812        | PVC based film       | 8.56 ± 1.30                                                   |
| 818        | PVC based film       | 9.27 ± 1.20                                                   |

**Table S3.** General features, fat,  $a_w$ , protein content and pH values of the Italian PDO cheeses.

|                              | Taleggio         | Quartiolo          | Provolone   | Casera     |
|------------------------------|------------------|--------------------|-------------|------------|
| Presence of cheese rind      | Yes              | Yes                | Yes         | Yes        |
| Thickness of cheese rind(mm) | 1 mm             | 1 mm               | 2 mm        | 2 mm       |
| Ripening time (months)       | 1                | 1                  | 3           | 3          |
| Shape/weight whole cheese    | Rectangular 2 kg | Rectangular 1.8 kg | Round 12 kg | Round 7 kg |
| Protein (%)                  | 19.7             | 19.9               | 23.8        | 27.1       |
| Fat (%)                      | 27.5             | 28.2               | 26.9        | 33.8       |
| Fat (%)–dry weight           | 52.2             | 51.1               | 47.9        | 49.4       |
| $a_w$                        | 0.961            | 0.975              | 0.967       | 0.945      |
| pH                           | 5.27             | 4.5                | 5.19        | 5.1        |

**Table S4.** Selected reaction monitoring (SIM) parameters of the studied compounds migrated from cling-films to cheeses.

| Compound         | CAS Number | Qualifier Ions | Quantifier Ion |
|------------------|------------|----------------|----------------|
|                  |            | $m/z$          | $m/z$          |
| 2-Ethylhexanol   | [104-76-7] | 41, 57, 112    | 57             |
| Ethylbenzene     | [100-41-4] | 77, 91, 106    | 91             |
| <i>p</i> -Xylene | [106-42-3] | 77, 91, 106    | 91             |
| <i>m</i> -Xylene | [108-38-3] | 77, 91, 106    | 91             |
| <i>o</i> -Xylene | [95-47-6]  | 77, 91, 106    | 91             |
| Styrene          | [100-42-5] | 51, 78, 104    | 104            |
| Triacetin        | [102-76-1] | 43, 103, 145   | 43             |

**Table S6.** VOCs profile by HS-SPME-GC/MS from “mandrino” of cling-films roll for retail use.

| Rt <sup>a</sup>     | Volatile Compounds <sup>b</sup> | Mandrino of Cling-Films for Retail Use <sup>c</sup> |                |                |
|---------------------|---------------------------------|-----------------------------------------------------|----------------|----------------|
|                     |                                 | 812 PVC Based                                       | 818 PVC Based  | PE 200PE Based |
| <i>Hydrocarbons</i> |                                 |                                                     |                |                |
| 1.63                | Heptane                         | 0.12                                                | nd             | nd             |
| 5.17                | Decane                          | nd                                                  | 0.24           | 1.34           |
| 16.18               | Styrene                         | 0.44                                                | 1.25           | 0.88           |
| <b>total</b>        |                                 | <b>0.56</b>                                         | <b>1.49</b>    | <b>2.22</b>    |
| <i>Esters</i>       |                                 |                                                     |                |                |
| 2.77                | Acetic acid ethyl ester         | 0.56                                                | 0.77           | 0.23           |
| <i>Terpenes</i>     |                                 |                                                     |                |                |
| 5.49                | $\alpha$ -Pinene                | 27.50                                               | 4.36           | 155.20         |
| 12.73               | $\beta$ -Myrcene                | 150.44                                              | 123.12         | 145.51         |
| 13.85               | D-Limonene                      | 1122.23                                             | 1235.13        | 1221.01        |
| 22.57               | Citronellol                     | 12.44                                               | 90.76          | 84.98          |
| <b>total</b>        |                                 | <b>1312.61</b>                                      | <b>1453.36</b> | <b>1606.50</b> |

<sup>a</sup> Retention time; <sup>b</sup> Volatile compounds: mass spectra tentatively identified using NIST 05 and Wiley 275 libraries; <sup>c</sup> Amount of volatile compounds expressed as  $\mu\text{g IS equivalents g}^{-1}$  of mandrino samples; nd = not detected.
